# Supplementary material for: When and Why Did Human Brains Decrease in Size? A New Change-Point Analysis and Insights From Brain Evolution in Ants
Source: Frontiers journal article supplement (doi:10.3389/fevo.2021.742639), 2021-10-22
Supplement: Table_1.XLSX [file Table_1.XLSX]

## Sheet: All
Species	Specimen	CC	Source	Age	Source
Rudapithecus	RUD 77	326	Begun	9.85	Begun
Rudapithecus	RUD 200	234	Gunz et al., 2020	9.85	Begun
Sahelanthropus	TM 266-01-060	365	Falk	7
Ar. ramidus	ARA-VP-6/500	300	Suwa et al., 2009	4.4	White et al., 2009
A. anamensis	MRD-VP-1/1	367	Haile-Selassie et al., 2019	3.8	Haile-Selassie et al., 2019
A. afarensis	AL 162-28	392.5	Holloway, 1981	3.2
A. afarensis	AL 333-45	488	Gunz et al., 2020	3.2
A. afarensis	AL 288-1	387.5	Gunz et al., 2020	3.18
A. afarensis	AL 822-1	382	Gunz et al., 2020	3.1	Kimbel & Rak, 2010
A. afarensis	AL 444-2	522	Gunz et al., 2020	3
A. africanus	MLD 1	510	Holloway et al., 2004	2.65
A. africanus	MLD 37/38	430	Holloway et al., 2004	2.65
A. aethiopicus	KNM-WT 17000	410	Holloway et al., 2004	2.5
A. garhi	Bouri	450	Holloway et al., 2004	2.5
A. boisei	Omo L388y-6	427	Holloway et al., 2004	2.38
A. africanus	Stw 505	555	Holloway et al., 2004	2.35
A. boisei	Omo 323-1976-896	490	Brown et al., 1993	2.23
A. africanus	Sts 19/58	436	Holloway et al., 2004	2.1
A. africanus	Sts 5	485	Holloway et al., 2004	2.1
A. africanus	Sts 60	400	Holloway et al., 2004	2.1
A. africanus	Sts 71	428	Holloway et al., 2004	2.1
A. africanus	Type 2	457	Holloway et al., 2004	2.1
A. robustus	DNH 155	450	Martin et al., 2020	2
A. sediba	MH 1	420	Berger et al., 2010	1.977
H. habilis	KNM-ER 1805	582	Holloway et al., 2004	1.89
H. habilis	KNM-ER 1813	509	Holloway et al., 2004	1.89
H. habilis	OH 24	597	Tobias, 1991	1.88
H. rudolfensis	KNM-ER 1470	752	Holloway et al., 2004	1.88
H. rudolfensis	KNM-ER 3732	750	Holloway et al., 2004	1.88
A. boisei	KNM-ER 23000	491	Brown et al., 1993	1.87
A. boisei	KNM-WT 13750	475	Holloway et al., 2004	1.87
A. boisei	KNM-ER 407	510	Holloway et al., 2004	1.85
H. rudolfensis	KNM-ER 1590	825	Holloway et al., 2004	1.85
A. boisei	OH 5	522.5	Holloway et al., 2004	1.82
H. habilis	OH 7	777	Tobias, 1991	1.8
A. boisei	KNM-WT 17400	400	Holloway et al., 2004	1.77
H. erectus	D2280	775	Rightmire et al., 2006	1.77	Rightmire et al., 2006
H. erectus	D2282	655	Rightmire et al., 2006	1.77	Rightmire et al., 2006
H. erectus	D2700	600	Rightmire et al., 2006	1.77	Rightmire et al., 2006
H. erectus	D3444	650	Lordkipanidze et al., 2006	1.77	Lordkipanidze et al., 2006
H. erectus	D5000	546	Lordkipanidze et al., 2013	1.77
A. robustus	Drimolen	530	Schwartz & Tattersall	1.75
H. habilis	OH 16	638	Tobias, 1991	1.67
A. robustus	SK 1585	530	Holloway et al., 2004	1.65
H. erectus	KNM-ER 3733	848	Holloway, 1981	1.63	Feibel et al., 1989
H. erectus	Gongwang 1	780	Holloway et al., 2004	1.63	Zhu et al., 2015
H. erectus	Sangiran 4	908	Holloway et al., 2004	1.62	Indriati and Anton, 2010
H. habilis	OH 13	673	Tobias, 1991	1.6
A. boisei	KNM-ER 406	500	Holloway et al., 2004	1.58
A. boisei	KNM-ER 732	500	Holloway et al., 2004	1.58
H. erectus	KNM-ER 3883	804	Holloway et al., 2004	1.57	Feibel et al., 1989
H. erectus	KNM-ER 42700	691	Spoor et al., 2007	1.55	Spoor et al., 2007
H. erectus	DAN5	598	Semaw et al., 2020	1.55	Semaw et al., 2020
H. erectus	Sangiran 38	850	Indriati and Anton, 2010	1.52	Indriati and Anton, 2010
H. erectus	KNM-WT 15000	880	Begun & Walker, 1993	1.49
A. boisei	Konso	545	Holloway et al., 2004	1.42
H. erectus	Sangiran 10	855	Holloway et al., 2004	1.29	Larick et al., 2001
H. erectus	Sangiran 12	1059	Holloway et al., 2004	1.29	Larick et al., 2001
H. erectus	Sangiran 2	813	Holloway, 1981	1.29	Larick et al., 2001
H. erectus	Sangiran 17	1004	Holloway, 1981	1.29	Larick et al., 2001
H. erectus	BSN12/P1	850	Semaw et al., 2020	1.26	Semaw et al., 2020
H. erectus	Grogol-Wetan (Gwn-1993.09)	850	Grimaud-Herve, pers comm	1.25	Larick et al., 2001
H. erectus	OH 9	1067	Holloway et al., 2004	1.25
H. erectus	Bukaran (SBK-1996.02)	916	Grimaud-Herve et al., 2012	1.25	Larick et al., 2001
H. erectus	Sangiran IX	870	Kaifu et al., 2011	1.25	Larick et al., 2001
H. erectus	Buia	900	Macciarelli et al., 2004	1	Abbate et al., 1998				61
H. erectus	Daka	986	Gilbert and Asfaw, 2008	1	Asfaw et al., 2002
H. erectus	Yunxian	1050	Vialet et al., 2010	0.936	de Lumley et al., 2008
H. erectus	Trinil 2	940	Holloway, 1981	0.9	Anton, 2003
H. erectus	Sangiran 3	950	Holloway et al., 2004	0.9	Larick et al., 2001
H. heidelbergensis	Ceprano	1150	Bruner and Manzi, 2005	0.85	Bruner and Manzi, 2005
H. erectus	Zhoukodian Z10	1225	Weidenreich, 1943	0.73
H. erectus	Zhoukodian Z-11	1015	Weidenreich, 1943	0.73
H. erectus	Zhoukodian Z12	1030	Weidenreich, 1943	0.73
H. erectus	Zhoukodian Z-2	1030	Weidenreich, 1943	0.73
H. erectus	ZKD III	915	Weidenreich, 1943	0.73
H. erectus	OH 12	727	Holloway et al., 2004	0.7
H. erectus	Nanjing	876	Liu et al., 2005	0.6	Wu et al., 2011
H. heidelbergensis	Bodo	1250	Conroy et al., 2000	0.6
H. erectus	Ngawi	870	Holloway et al., 2004	0.5
H. heidelbergensis	Saldanha	1225	Tobias, 1971	0.5
H. erectus	ZKD V	1140	Wu et al., 2010	0.45	Shen et al., 2009
H. heidelbergensis	Arago	1166	Holloway et al., 2004	0.45
H. heidelbergensis	Atapuerca 4	1360	Arsuaga et al., 2014	0.43
H. heidelbergensis	Atapuerca 5	1092	Arsuaga et al., 2014	0.43
H. heidelbergensis	Atapuerca 2	1333.5	Arsuaga et al., 2014	0.43
H. heidelbergensis	Atapuerca 7	1143.5	Arsuaga et al., 2014	0.43
H. heidelbergensis	Atapuerca 10	1218	Arsuaga et al., 2014	0.43
H. heidelbergensis	Atapuerca 12	1227.5	Arsuaga et al., 2014	0.43
H. heidelbergensis	Atapuerca 13	1436.5	Arsuaga et al., 2014	0.43
H. heidelbergensis	Atapuerca 15	1283.5	Arsuaga et al., 2014	0.43
H. heidelbergensis	Atapuerca 16	1236	Arsuaga et al., 2014	0.43
H. heidelbergensis	Atapuerca 17	1218.5	Arsuaga et al., 2014	0.43
H. erectus	Hexian	1025	Wu & Dong, 1982	0.412	Grun et al., 1998
H. heidelbergensis	Ndutu	1100	Holloway in Rightmire, 1983	0.4
H. heidelbergensis	Swanscombe	1325	Holloway et al., 2004	0.3
H. sapiens	Jebel Irhoud 1	1305	Holloway et al., 2004	0.3
H. sapiens	Jebel Irhoud 2	1400	Holloway et al., 2004	0.3
H. heidelbergensis	Kabwe	1325	Holloway et al., 2004	0.299
H. naledi	DH3/DH4	465	Garvin et al., 2017	0.286
H. naledi	DH1/DH2	560	Garvin et al., 2017	0.286
H. naledi	LES 1	610	Hawks et al., 2017	0.286
H. heidelbergensis	Jinniushan	1390	Holloway et al., 2004	0.28
H. heidelbergensis	Guomde	1400	Holloway et al., 2004	0.272	Brauer et al., 1997
H. neanderthalensis	Apidima 2	1454	Harvarti et al., 2011	0.252	Harvarti et al., 2011
H. neanderthalensis	Saccopastore 1	1174	Bruner and Manzi, 2008	0.25
H. neanderthalensis	Saccopastore 2	1300	Holloway et al., 2004	0.25
H. heidelbergensis	Sale	880	Holloway et al., 2004	0.24
H. heidelbergensis	Narmada	1260	Holloway et al., 2004	0.236
H. heidelbergensis	Ehringsdorf	1450	Holloway et al., 2004	0.23
H. heidelbergensis	Steinheim	1140	Prossinger et al., 2003	0.225	Adam, 1985
H. heidelbergensis	Eliye Springs (KNM-ER 11693)	1212	Brauer et al., 1997	0.225
H. heidelbergensis	Petralona	1230	Holloway et al., 2004	0.21
H. heidelbergensis	Dali	1120	Holloway et al., 2004	0.209
H. neanderthalensis	Reilingen	1430	Holloway et al., 2004	0.2
H. sapiens	Omo 2 (Kibbish)	1435	Holloway et al., 2004	0.195	CHECK
H. neanderthalensis	Biache	1200	Holloway et al., 2004	0.175
H. neanderthalensis	Fontechevade II	1350	Holloway et al., 2004	0.16
H. sapiens	Herto	1450	Holloway et al., 2004	0.16
H. neanderthalensis	La Chaise	1065	Holloway et al., 2004	0.15
H. longi	Harbin	1420	Ji et al., 2021	0.148
H. sapiens	Singa 1	1550	Holloway et al., 2004	0.133
H. neanderthalensis	Lazaret	1250	Holloway et al., 2004	0.13
H. neanderthalensis	Krapina 2	1450	Holloway et al., 2004	0.13
H. neanderthalensis	Krapina 3	1255	Holloway et al., 2004	0.13
H. neanderthalensis	Krapina 5	1535	Caspari & Radovcic, 2006	0.13
H. neanderthalensis	Krapina 6 (Cranium E)	1205	Holloway et al., 2004	0.13
H. sapiens	Skhul 1	1450	Holloway et al., 2004	0.13		156
H. sapiens	Skhul 4	1554	Holloway et al., 2004	0.13
H. sapiens	Skhul 5	1520	Holloway et al., 2004	0.13
H. sapiens	Skhul 9	1590	Holloway et al., 2004	0.13
H. sapiens	Yinkou	1390	Holloway et al., 2004	0.13
H. sapiens	Laetoli 18	1367	Holloway et al., 2004	0.12
H. erectus	Xuchang 1	1800	Li et al., 2017	0.115
H. erectus	Ngandong (Solo 9)	1135	Holloway et al., 2004	0.11
H. erectus	Ngandong 1	1172	Holloway et al., 2004	0.11
H. erectus	Ngandong 13	1231	Holloway et al., 2004	0.11
H. erectus	Ngandong 14	1090	Holloway et al., 2004	0.11
H. erectus	Ngandong 6	1251	Holloway et al., 2004	0.11
H. erectus	Ngandong 7	1028	Balzeau et al., 2003	0.11
H. neanderthalensis	Tabun 1	1271	Holloway et al., 2004	0.11
H. sapiens	Qafzeh 11	1280	Holloway et al., 2004	0.11
H. sapiens	Qafzeh 6	1568	Holloway et al., 2004	0.11
H. sapiens	Qafzeh 9	1531	Holloway et al., 2004	0.11
H. neanderthalensis	Ganovce	1320	Holloway et al., 2004	0.09
H. sapiens	Border Cave	1522	Hughes, 1990	0.09	?
H. neanderthalensis	La Ferrassie	1640	Holloway et al., 2004	0.07
H. neanderthalensis	Teshik Tash	1525	Holloway et al., 2004	0.07
H. neanderthalensis	Spy 1	1305	Holloway et al., 2004	0.068
H. neanderthalensis	Spy 2	1553	Holloway et al., 2004	0.068
H. sapiens	Liujiang	1480	Phenice & Sauer, 1977	0.067	Wu and Poirier, 1995
H. neanderthalensis	La Quina 18	1200	Holloway et al., 2004	0.065
H. neanderthalensis	La Quina 5	1172	Holloway et al., 2004	0.065
H. neanderthalensis	Engis 2	1362	Holloway et al., 2004	0.06
H. neanderthalensis	Shanidar 1	1600	Holloway et al., 2004	0.06
H. neanderthalensis	Shanidar 5	1550	Holloway et al., 2004	0.06
H. floresiensis	LB1	419	Falk	0.06
H. erectus	Sambungmacan 1	1035	Baba et al., 2003	0.055
H. erectus	Sambungmacan 3	917	Broadfield et al., 2001	0.055
H. erectus	Sambungmacan 4	1006	Baba et al., 2003	0.055
H. sapiens	Manot Cave	1100	Hershkovitz et al., 2015	0.0547
H. neanderthalensis	Mt. Circeo	1360	Holloway et al., 2004	0.052
H. neanderthalensis	Gibraltar	1200	Holloway et al., 2004	0.05
H. neanderthalensis	Devils Tower	1400	Holloway et al., 2004	0.05
H. neanderthalensis	La Chapelle	1625	Holloway et al., 2004	0.05
H. sapiens	Ryonggok 3	1650	Bae et al., 2010	0.047	Keates, 2010
H. sapiens	Ryonggok 7	1450	Bae et al., 2010	0.047	Keates, 2010
H. neanderthalensis	Amud	1740	Holloway et al., 2004	0.041
H. neanderthalensis	Le Moustier	1565	Holloway et al., 2004	0.041
H. neanderthalensis	Neandertal	1525	Holloway et al., 2004	0.04
H. sapiens	Liujiang	1567	Wu et al., 2008	0.04
H. sapiens	Nazlet Khater 2	1420	Holloway et al., 2004	0.0376	Holt
H. sapiens	Hofmeyr	1580	Grine et al., 2010	0.036	Grine et al., 2007
H. sapiens	Wadjak 1	1464	Coon, 1962	0.033	Storm et al., 2013
H. sapiens	Wadjak 2	1650	many sources in Henn	0.033	Storm et al., 2013
H. sapiens	Chatelperron (les Fees)	1425	Ivanhoe, 2010	0.033	Ivanhoe, 2010
H. sapiens	Mladec 5	1650	Holloway et al., 2004	0.032
H. sapiens	Jingchuan	1524	HaiJun et al., 2010	0.0315	HaiJun et al., 2010
H. sapiens	Mladec 2	1390	Holloway et al., 2004	0.0313	Holt
H. sapiens	Mladec 1	1540	Holloway et al., 2004	0.0312	Holt
H. sapiens	Ziyang	1210	Phenice & Sauer, 1977	0.03	Wu and Poirier, 1995
H. sapiens	Zhoukoudian (Upper Cave) 1	1500	Holloway et al., 2004	0.029	Holt
H. sapiens	Zhoukoudian (Upper Cave) 2	1380	Holloway et al., 2004	0.029	Holt
H. sapiens	Zhoukoudian (Upper Cave) 3	1290	Holloway et al., 2004	0.029	Holt
H. sapiens	Cioclovina	1499	Kranioti et al., 2011	0.0285	Holt
H. sapiens	Combe Capelle	1570	Holloway et al., 2004	0.028
H. sapiens	Cro-Magnon 1	1730	Holloway et al., 2004	0.0277	Holt
H. sapiens	Cro-Magnon 2	1402	Helmuth, 1999	0.0277	Holt
H. sapiens	Cro-Magnon 3	1590	Holloway et al., 2004	0.0277	Holt
H. sapiens	Grotte des Infants 4	1775	Holloway et al., 2004	0.0275
H. sapiens	Grotte des Infants 5	1375	Holloway et al., 2004	0.0275
H. sapiens	Grotte des Infants 6	1580	Holloway et al., 2004	0.0275
H. sapiens	Sungir 1	1464	Holloway et al., 2004	0.0271	Dobrovolskeya et al., 2012
H. sapiens	Dolni Vestonice 14	1538	Franciscus & Vlcek, 2006	0.0266	Holt
H. sapiens	Dolni Vestonice 13	1481	Franciscus & Vlcek, 2006	0.0266	Holt
H. sapiens	Dolni Vestonice 15	1378	Franciscus & Vlcek, 2006	0.0266	Holt
H. sapiens	Sungir 3	1361	Holloway et al., 2004	0.026	Dobrovolskeya et al., 2012
H. sapiens	Brno I	1600	Holloway et al., 2004	0.026
H. sapiens	Brno III	1304	Holloway et al., 2004	0.026
H. sapiens	Pavlov 1	1472	Franciscus & Vlcek, 2006	0.026	Holt
H. sapiens	Predmosti 10	1452	Holloway et al., 2004	0.026
H. sapiens	Predmosti 3	1580	Holloway et al., 2004	0.026
H. sapiens	Predmosti 4	1250	Holloway et al., 2004	0.026
H. sapiens	Predmosti 9	1555	Holloway et al., 2004	0.026
H. sapiens	Dolni Vestonice 3	1285	Franciscus & Vlcek, 2006	0.026	Holt
H. sapiens	WLH 50	1540	Kubo and Kono, 2011	0.026	Grun et al., 2011
H. sapiens	Dolni Vestonice 16	1547	Franciscus & Vlcek, 2006	0.0256	Holt
H. sapiens	Barma Grande II	1748	Parenti, 1973	0.0248	Holt
H. sapiens	Sungir 5	1453	Holloway et al., 2004	0.024
H. sapiens	Veyrier 1	1430	Holloway et al., 2004	0.024
H. sapiens	Kostenki 2	1605	Holloway et al., 2004	0.0238
H. sapiens	Sungir 2	1267	Holloway et al., 2004	0.0238	Holt
H. sapiens	Brno II	1500	Holloway et al., 2004	0.0237	Holt
H. sapiens	Arene Candide 1-IP	1490	Ruff et al., 1997	0.0234	Holt
H. sapiens	Kostenki 14	1222	Holloway et al., 2004	0.0228
H. sapiens	Mollet III	1521	Soler et al., 2013	0.02233	Soler et al., 2013
H. sapiens	Pataud 1	1380	Holloway et al., 2004	0.022	Holt
H. sapiens	Roc de Sers	1380	Ivanhoe, 2010	0.01923	Straus, 1986
H. sapiens	Roc de Sers	1485	Ivanhoe, 2010	0.01923	Straus, 1986
H. sapiens	Cohuna	1447	Brown, website	0.019	"Contemporary with Kow Swamp" Wood
H. sapiens	Minatogawa 1	1335	Kubo & Kono, 2011	0.0183	Holt
H. sapiens	Minatogawa 2	1170	Holloway et al., 2004	0.0183	Holt
H. sapiens	Minatogawa 4	1170	Kubo & Kono, 2011	0.0183	Holt
H. sapiens	Le Placard	1300	Ivanhoe, 2010	0.018	Ivanhoe, 2010
H. sapiens	Rond-du-Barry 8	1515	Ivanhoe, 2010	0.0171	Holt
H. sapiens	Taforalt, Algeria	1660	Ferembach, 1965	0.0168	Holt
H. sapiens	Taforalt, Algeria	1675	Ferembach, 1965	0.0168	Holt
H. sapiens	Taforalt, Algeria	1689	Ferembach, 1965	0.0168	Holt
H. sapiens	Taforalt, Algeria	1660	Ferembach, 1965	0.0168	Holt
H. sapiens	Taforalt, Algeria	1622	Ferembach, 1965	0.0168	Holt
H. sapiens	Taforalt, Algeria	1685	Ferembach, 1965	0.0168	Holt
H. sapiens	Taforalt, Algeria	1585	Ferembach, 1965	0.0168	Holt
H. sapiens	Taforalt, Algeria	1686	Ferembach, 1965	0.0168	Holt
H. sapiens	Taforalt, Algeria	1700	Ferembach, 1965	0.0168	Holt
H. sapiens	Taforalt, Algeria	1738	Ferembach, 1965	0.0168	Holt
H. sapiens	Taforalt, Algeria	1623	Ferembach, 1965	0.0168	Holt
H. sapiens	Taforalt, Algeria	1478	Ferembach, 1965	0.0168	Holt
H. sapiens	Taforalt, Algeria	1645	Ferembach, 1965	0.0168	Holt
H. sapiens	Taforalt, Algeria	1390	Ferembach, 1965	0.0168	Holt
H. sapiens	Taforalt, Algeria	1360	Ferembach, 1965	0.0168	Holt
H. sapiens	Taforalt, Algeria	1279	Ferembach, 1965	0.0168	Holt
H. sapiens	Taforalt, Algeria	1385	Ferembach, 1965	0.0168	Holt
H. sapiens	Taforalt, Algeria	1435	Ferembach, 1965	0.0168	Holt
H. sapiens	Taza, Algeria	1125	Meier et al., 2003	0.016	Meier et al., 2003
H. sapiens	St. Germain-la-Rivie	1354	Movius, 1975	0.0158	Holt
H. sapiens	Bruniquel 2	1555	Movius, 1975	0.0153	Holt
H. sapiens	Chancelade	1530	Holloway et al., 2004	0.0153	Holt
H. sapiens	Cap Blanc 1	1434	Movius, 1975	0.015	Holt
H. sapiens	Coobool Creek	1413	Brown, website	0.014	Brown
H. sapiens	Coobool Creek	1387	Brown, website	0.014	Brown
H. sapiens	Coobool Creek	1324	Brown, website	0.014	Brown
H. sapiens	Coobool Creek	1281	Brown, website	0.014	Brown
H. sapiens	Coobool Creek	1444	Brown, website	0.014	Brown
H. sapiens	Coobool Creek	1483	Brown, website	0.014	Brown
H. sapiens	Coobool Creek	1437	Brown, website	0.014	Brown
H. sapiens	Coobool Creek	1541	Brown, website	0.014	Brown
H. sapiens	Coobool Creek	1502	Brown, website	0.014	Brown
H. sapiens	Coobool Creek	1302	Brown, website	0.014	Brown
H. sapiens	Coobool Creek	1538	Brown, website	0.014	Brown
H. sapiens	Coobool Creek	1444	Brown, website	0.014	Brown
H. sapiens	Coobool Creek	1397	Brown, website	0.014	Brown
H. sapiens	Coobool Creek	1463	Brown, website	0.014	Brown
H. sapiens	Coobool Creek	1511	Brown, website	0.014	Brown
H. sapiens	Coobool Creek	1441	Brown, website	0.014	Brown
H. sapiens	Coobool Creek	1305	Brown, website	0.014	Brown
H. sapiens	Coobool Creek	1225	Brown, website	0.014	Brown
H. sapiens	Coobool Creek	1256	Brown, website	0.014	Brown
H. sapiens	Coobool Creek	1324	Brown, website	0.014	Brown
H. sapiens	Coobool Creek	1470	Brown, website	0.014	Brown
H. sapiens	Coobool Creek	1117	Brown, website	0.014	Brown
H. sapiens	Coobool Creek	1371	Brown, website	0.014	Brown
H. sapiens	Coobool Creek	1278	Brown, website	0.014	Brown
H. sapiens	Mas d'Azil	1275	Movius, 1975	0.014	Ivanhoe, 2010
H. sapiens	San Teodoro 1	1565	Holloway et al., 2004	0.014	D'Amore et al., 2009
H. sapiens	San Teodoro 2	1569	Holloway et al., 2004	0.014	D'Amore et al., 2009
H. sapiens	San Teodoro 3	1560	Holloway et al., 2004	0.014	D'Amore et al., 2009
H. sapiens	San Teodoro 5	1484	Holloway et al., 2004	0.014	D'Amore et al., 2009
H. sapiens	MLDG, China	1327	Curnoe et al., 2012	0.0139	Curnoe et al., 2012
H. sapiens	Les Hoteaux	1403	Ivanhoe, 2010	0.013	Ivanhoe, 2010
H. sapiens	Ortucchio 1	1302	Ivanhoe, 2010	0.0126	Holt
H. sapiens	Oberkassel 2	1370	Movius, 1975	0.0122	Holt
H. sapiens	Laugerie-Basse	1505	Ivanhoe, 2010	0.012	Ivanhoe, 2010
H. sapiens	Keilor	1497	Brown, website	0.012	Brown et al., 2010
H. sapiens	Arene Candide 1	1414	Ruff et al., 1997	0.0118	Wood
H. sapiens	Arene Candide 2	1424	Ruff et al., 1997	0.0118	Wood
H. sapiens	Arene Candide 4	1520	Ruff et al., 1997	0.0118	Wood
H. sapiens	Arene Candide 5	1661	Ruff et al., 1997	0.0118	Wood
H. sapiens	Le Bichon 1	1465	Ivanhoe, 2010	0.0117	Holt		699
H. sapiens	Oberkassel 1	1500	Holloway et al., 2004	0.0116	Holt
H. sapiens	Afalou, Algeria	1672	Vallois, 1952	0.0115	Holt
H. sapiens	Afalou, Algeria	1520	Vallois, 1952	0.0115	Holt
H. sapiens	Afalou, Algeria	1700	Vallois, 1952	0.0115	Holt
H. sapiens	Afalou, Algeria	1577	Vallois, 1952	0.0115	Holt
H. sapiens	Afalou, Algeria	1713	Vallois, 1952	0.0115	Holt
H. sapiens	Afalou, Algeria	1630	Vallois, 1952	0.0115	Holt
H. sapiens	Afalou, Algeria	1530	Vallois, 1952	0.0115	Holt
H. sapiens	Afalou, Algeria	1672	Vallois, 1952	0.0115	Holt
H. sapiens	Afalou, Algeria	1584	Vallois, 1952	0.0115	Holt
H. sapiens	Afalou, Algeria	1774	Vallois, 1952	0.0115	Holt
H. sapiens	Afalou, Algeria	1716	Vallois, 1952	0.0115	Holt
H. sapiens	Afalou, Algeria	1536	Vallois, 1952	0.0115	Holt
H. sapiens	Afalou, Algeria	1486	Vallois, 1952	0.0115	Holt
H. sapiens	Afalou, Algeria	1597	Vallois, 1952	0.0115	Holt
H. sapiens	Afalou, Algeria	1519	Vallois, 1952	0.0115	Holt
H. sapiens	Afalou, Algeria	1475	Vallois, 1952	0.0115	Holt
H. sapiens	Afalou, Algeria	1266	Vallois, 1952	0.0115	Holt
H. sapiens	Afalou, Algeria	1291	Vallois, 1952	0.0115	Holt
H. sapiens	Afalou, Algeria	1604	Vallois, 1952	0.0115	Holt
H. sapiens	Afalou, Algeria	1249	Vallois, 1952	0.0115	Holt
H. sapiens	Afalou, Algeria	1630	Vallois, 1952	0.0115	Holt
H. sapiens	Afalou, Algeria	1697	Vallois, 1952	0.0115	Holt
H. sapiens	Afalou, Algeria	1316	Vallois, 1952	0.0115	Holt
H. sapiens	Afalou, Algeria	1581	Vallois, 1952	0.0115	Holt
H. sapiens	Afalou, Algeria	1154	Vallois, 1952	0.0115	Holt
H. sapiens	Nacurrie	1597	Brown, website	0.0114	Brown et al., 2010
H. sapiens	Moča	1277.3	Sefcakova et al., 2011	0.0113	Sefcakova et al., 2011
H. sapiens	Cheix	1470	Ivanhoe, 2010	0.011	Ivanhoe, 2010
H. sapiens	Duruthy	1140	Movius, 1975	0.011	Ivanhoe, 2010
H. sapiens	Tuinplaas	1589	Hughes, 1990	0.011	Dusseldorp et al., 2013
H. sapiens	Naivasha	1453	Tobias, 1971	0.01085	Protsch, 1976
H. sapiens	Aveline's Hole, Somerset	1450	Palmer, 1959	0.0103	Miles, 2003
H. sapiens	Mai Da Nuoc	1429.7	Cuong, 1987	0.01	Cuong, 1987
H. sapiens	Tepaxpan	1540	Phenice & Sauer, 1977	0.01	Phenice & Sauer, 1977
H. sapiens	Boskop	1650	Tobias, 1971	0.01	?
H. sapiens	Hotu 2	1404	Angel, 1952	0.0093	Coon, 1957
H. sapiens	Hotu 3	1440	Angel, 1952	0.0093	Coon, 1957
H. sapiens	Culoz I	1535	Ferembach 1974b	0.009	Evin et al 1971
H. sapiens	Culoz II	1644	Ferembach 1974b	0.009	Evin et al 1971
H. sapiens	M4300, Bass Strait	1265	Murray et al., 1982	0.009	Murray et al., 1982
H. sapiens	Gamble's Cave 4	1470	Tobias, 1971	0.0082	efossils
H. sapiens	Gamble's Cave 5	1530	Tobias, 1971; Leakey, 1935	0.0082	efossils
H. sapiens	Gramat	1861	Ferembach 1974b	0.008	Gruber et al., 2009
H. sapiens	Mai Da Dieu	1271	Cuong, 1986	0.008	Matsumura
H. sapiens	Teviec 8	1430	Balzeau, PC	0.008	Gruber et al., 2009
H. sapiens	Teviec 9	1420	Balzeau, PC	0.008	Gruber et al., 2009
H. sapiens	Teviec 16	1428	Balzeau, PC	0.008	Gruber et al., 2009
H. sapiens	Rastel	1682	Ferembach 1974b	0.0075	Rozoy, 1978
H. sapiens	Song Terus	1570	Balzeau, PC	0.0075	Balzeau, 2013
H. sapiens	Fish Hoek 1	1600	Drennen, 1929	0.0072	Stynder et al., 2009
H. sapiens	Haverty 5, CA	1380	Brooks et al., 1990	0.007	Brooks et al., 1990
H. sapiens	Haverty 7, CA	1310	Brooks et al., 1990	0.007	Brooks et al., 1990
H. sapiens	Lake Nitchie	1510	Brown, website	0.007	Bulbeck & O'Connor, 2011
H. sapiens	Punin	1275	Phenice & Sauer, 1977	0.007	Brothwell & Burleigh, 1980
H. sapiens	Montclus	1687	Ferembach 1974b	0.007	Schute Im Walde et al 1986
H. sapiens	Lansing	1537.5	Hrdlicka, 1903	0.0055	Bass, 1973
H. sapiens	Columnata, Algeria	1351	Chamla, 1970	0.0055	Chamla, 1980
H. sapiens	Columnata, Algeria	1498	Chamla, 1970	0.0055	Chamla, 1980
H. sapiens	Columnata, Algeria	1426	Chamla, 1970	0.0055	Chamla, 1980
H. sapiens	Asselar	1520	Tobias, 1971	0.005	Phenice & Sauer, 1977
H. sapiens	Hutton, Somerset	1415	Palmer, 1959	0.005	Palmer, 1959
H. sapiens	Urtiaga B	1579	Ferembach 1974b	0.0035	Altua & de la Rua, 1989
H. sapiens	Urtiaga A	1510	Ferembach 1974b	0.0035	Altua & de la Rua, 1989
H. sapiens	Sauveterre	1769	Ferembach 1974b	0.0034	Smith, 1984
H. sapiens	Danes' Graves 1	1325	Wright, 1903	0.00225	Wright, 1903
H. sapiens	Danes' Graves 7	1325	Wright, 1903	0.00225	Wright, 1903
H. sapiens	Glastonbury, Somerset	1468	Palmer, 1959	0.002	Palmer, 1959
H. sapiens	Elmenteita B	1585	Hughes, 1990	0.002	Hennenberg
H. sapiens	Langwith, Derbyshire	1250	Gladstone, 1921	0.002	Chamberlain, 2007
H. sapiens	Loulan	1265	Keith, 1929	0.00175	Keith, 1929
H. sapiens	Loulan LT 03	1230	Keith, 1929	0.00175	Keith, 1929
H. sapiens	Niya	1140	Keith, 1929	0.0017	Keith, 1929
H. sapiens	Bambandyanalo	1316.8	Galloway, 1959	0.00106	Galloway, 1959
H. sapiens	Bambandyanalo	1563	Galloway, 1959	0.00106	Galloway, 1959
H. sapiens	Bambandyanalo	1402.7	Galloway, 1959	0.00106	Galloway, 1959
H. sapiens	Bambandyanalo	1565.1	Galloway, 1959	0.00106	Galloway, 1959
H. sapiens	Bambandyanalo	1341.6	Galloway, 1959	0.00106	Galloway, 1959
H. sapiens	Bambandyanalo	1280	Galloway, 1959	0.00106	Galloway, 1959
H. sapiens	Bambandyanalo	1384.5	Galloway, 1959	0.00106	Galloway, 1959
H. sapiens	Pecos	1300	Ruff et al., 1997	0.001	Ruff et al., 1997
H. sapiens	Pecos	1030	Ruff et al., 1997	0.001	Ruff et al., 1997
H. sapiens	Pecos	1275	Ruff et al., 1997	0.001	Ruff et al., 1997
H. sapiens	Pecos	1300	Ruff et al., 1997	0.001	Ruff et al., 1997
H. sapiens	Pecos	1120	Ruff et al., 1997	0.001	Ruff et al., 1997
H. sapiens	Pecos	1380	Ruff et al., 1997	0.001	Ruff et al., 1997
H. sapiens	Pecos	1380	Ruff et al., 1997	0.001	Ruff et al., 1997
H. sapiens	Pecos	1270	Ruff et al., 1997	0.001	Ruff et al., 1997
H. sapiens	Pecos	1100	Ruff et al., 1997	0.001	Ruff et al., 1997
H. sapiens	Pecos	1465	Ruff et al., 1997	0.001	Ruff et al., 1997
H. sapiens	Pecos	1320	Ruff et al., 1997	0.001	Ruff et al., 1997
H. sapiens	Pecos	1285	Ruff et al., 1997	0.001	Ruff et al., 1997
H. sapiens	Pecos	1350	Ruff et al., 1997	0.001	Ruff et al., 1997
H. sapiens	Pecos	1440	Ruff et al., 1997	0.001	Ruff et al., 1997
H. sapiens	Pecos	1410	Ruff et al., 1997	0.001	Ruff et al., 1997
H. sapiens	Pecos	1350	Ruff et al., 1997	0.001	Ruff et al., 1997
H. sapiens	Pecos	1190	Ruff et al., 1997	0.001	Ruff et al., 1997
H. sapiens	Pecos	1300	Ruff et al., 1997	0.001	Ruff et al., 1997
H. sapiens	Pecos	1390	Ruff et al., 1997	0.001	Ruff et al., 1997
H. sapiens	Pecos	1350	Ruff et al., 1997	0.001	Ruff et al., 1997
H. sapiens	Pecos	1140	Ruff et al., 1997	0.001	Ruff et al., 1997
H. sapiens	Pecos	1155	Ruff et al., 1997	0.001	Ruff et al., 1997
H. sapiens	Pecos	1178	Ruff et al., 1997	0.001	Ruff et al., 1997
H. sapiens	Pecos	1340	Ruff et al., 1997	0.001	Ruff et al., 1997
H. sapiens	Pecos	1500	Ruff et al., 1997	0.001	Ruff et al., 1997
H. sapiens	Pecos	1550	Ruff et al., 1997	0.001	Ruff et al., 1997
H. sapiens	Pecos	1400	Ruff et al., 1997	0.001	Ruff et al., 1997
H. sapiens	Pecos	1350	Ruff et al., 1997	0.001	Ruff et al., 1997
H. sapiens	Pecos	1325	Ruff et al., 1997	0.001	Ruff et al., 1997
H. sapiens	Mupungubue	1591	Galloway, 1937	0.001	Galloway, 1959
H. sapiens	Dias Negress	1535.2	Winkler & Holler, 1988	0.00099	Winkler & Holler, 1988
H. sapiens	Bristol 1	1526	Bedde, 1907	0.00075	Bedde, 1907
H. sapiens	Bristol 2	1859	Bedde, 1907	0.00075	Bedde, 1907
H. sapiens	Bristol 3	1381	Bedde, 1907	0.00075	Bedde, 1907
H. sapiens	Bristol 4	1608	Bedde, 1907	0.00075	Bedde, 1907
H. sapiens	Bristol 7	1390	Bedde, 1907	0.00075	Bedde, 1907
H. sapiens	Bristol 9	1422	Bedde, 1907	0.00075	Bedde, 1907
H. sapiens	Bristol 10	1688	Bedde, 1907	0.00075	Bedde, 1907
H. sapiens	Bristol 11	1655	Bedde, 1907	0.00075	Bedde, 1907
H. sapiens	Paderborne	1541	Ruff et al., 1997	0.00025	FORGERY
H. sapiens	Cape Flats	1230	Drennen, 1929	0.00015	Dusseldorp et al., 2013
H. sapiens	Murray Valley Aborigines	996	Brown	0.0001	Brown
H. sapiens	Spialfields	1005	Brown	0.0001	Brown
H. sapiens	Swanport Aborigines	1020	Brown	0.0001	Brown
H. sapiens	Murray Valley Aborigines	1039	Brown	0.0001	Brown
H. sapiens	Murray Valley Aborigines	1039	Brown	0.0001	Brown
H. sapiens	Murray Valley Aborigines	1039	Brown	0.0001	Brown
H. sapiens	Murray Valley Aborigines	1047	Brown	0.0001	Brown
H. sapiens	Swanport Aborigines	1050	Brown	0.0001	Brown
H. sapiens	Swanport Aborigines	1050	Brown	0.0001	Brown
H. sapiens	Murray Valley Aborigines	1055	Brown	0.0001	Brown
H. sapiens	Swanport Aborigines	1055	Brown	0.0001	Brown
H. sapiens	Murray Valley Aborigines	1056	Brown	0.0001	Brown
H. sapiens	Murray Valley Aborigines	1062	Brown	0.0001	Brown
H. sapiens	Swanport Aborigines	1065	Brown	0.0001	Brown
H. sapiens	Swanport Aborigines	1065	Brown	0.0001	Brown
H. sapiens	Swanport Aborigines	1070	Brown	0.0001	Brown
H. sapiens	Swanport Aborigines	1075	Brown	0.0001	Brown
H. sapiens	Murray Valley Aborigines	1077	Brown	0.0001	Brown
H. sapiens	Swanport Aborigines	1080	Brown	0.0001	Brown
H. sapiens	Murray Valley Aborigines	1092	Brown	0.0001	Brown
H. sapiens	Murray Valley Aborigines	1100	Brown	0.0001	Brown
H. sapiens	Swanport Aborigines	1100	Brown	0.0001	Brown
H. sapiens	Swanport Aborigines	1100	Brown	0.0001	Brown
H. sapiens	Swanport Aborigines	1105	Brown	0.0001	Brown
H. sapiens	Murray Valley Aborigines	1115	Brown	0.0001	Brown
H. sapiens	Swanport Aborigines	1115	Brown	0.0001	Brown
H. sapiens	Swanport Aborigines	1120	Brown	0.0001	Brown
H. sapiens	Spialfields	1120	Brown	0.0001	Brown
H. sapiens	Murray Valley Aborigines	1122	Brown	0.0001	Brown
H. sapiens	Murray Valley Aborigines	1122	Brown	0.0001	Brown
H. sapiens	Murray Valley Aborigines	1122	Brown	0.0001	Brown
H. sapiens	Murray Valley Aborigines	1130	Brown	0.0001	Brown
H. sapiens	Murray Valley Aborigines	1130	Brown	0.0001	Brown
H. sapiens	Murray Valley Aborigines	1132	Brown	0.0001	Brown
H. sapiens	Murray Valley Aborigines	1138	Brown	0.0001	Brown
H. sapiens	Murray Valley Aborigines	1138	Brown	0.0001	Brown
H. sapiens	Murray Valley Aborigines	1140	Brown	0.0001	Brown
H. sapiens	Swanport Aborigines	1140	Brown	0.0001	Brown
H. sapiens	N. China	1140	Brown	0.0001	Brown
H. sapiens	Murray Valley Aborigines	1142	Brown	0.0001	Brown
H. sapiens	Murray Valley Aborigines	1145	Brown	0.0001	Brown
H. sapiens	Murray Valley Aborigines	1145	Brown	0.0001	Brown
H. sapiens	Swanport Aborigines	1145	Brown	0.0001	Brown
H. sapiens	Murray Valley Aborigines	1148	Brown	0.0001	Brown
H. sapiens	Murray Valley Aborigines	1148	Brown	0.0001	Brown
H. sapiens	Murray Valley Aborigines	1152	Brown	0.0001	Brown
H. sapiens	Murray Valley Aborigines	1153	Brown	0.0001	Brown
H. sapiens	Murray Valley Aborigines	1153	Brown	0.0001	Brown
H. sapiens	Murray Valley Aborigines	1153	Brown	0.0001	Brown
H. sapiens	Murray Valley Aborigines	1153	Brown	0.0001	Brown
H. sapiens	Swanport Aborigines	1155	Brown	0.0001	Brown
H. sapiens	Murray Valley Aborigines	1156	Brown	0.0001	Brown
H. sapiens	Spialfields	1160	Brown	0.0001	Brown
H. sapiens	Murray Valley Aborigines	1162	Brown	0.0001	Brown
H. sapiens	Murray Valley Aborigines	1163	Brown	0.0001	Brown
H. sapiens	Swanport Aborigines	1165	Brown	0.0001	Brown
H. sapiens	Spialfields	1165	Brown	0.0001	Brown
H. sapiens	Murray Valley Aborigines	1168	Brown	0.0001	Brown
H. sapiens	Murray Valley Aborigines	1175	Brown	0.0001	Brown
H. sapiens	Spialfields	1175	Brown	0.0001	Brown
H. sapiens	Murray Valley Aborigines	1180	Brown	0.0001	Brown
H. sapiens	Spialfields	1180	Brown	0.0001	Brown
H. sapiens	Spialfields	1180	Brown	0.0001	Brown
H. sapiens	Murray Valley Aborigines	1183	Brown	0.0001	Brown
H. sapiens	Murray Valley Aborigines	1183	Brown	0.0001	Brown
H. sapiens	Swanport Aborigines	1185	Brown	0.0001	Brown
H. sapiens	Swanport Aborigines	1185	Brown	0.0001	Brown
H. sapiens	China	1188	Brown	0.0001	Brown
H. sapiens	Murray Valley Aborigines	1189	Brown	0.0001	Brown
H. sapiens	Murray Valley Aborigines	1190	Brown	0.0001	Brown
H. sapiens	Swanport Aborigines	1190	Brown	0.0001	Brown
H. sapiens	Spialfields	1190	Brown	0.0001	Brown
H. sapiens	Murray Valley Aborigines	1193	Brown	0.0001	Brown
H. sapiens	Murray Valley Aborigines	1194	Brown	0.0001	Brown
H. sapiens	Swanport Aborigines	1195	Brown	0.0001	Brown
H. sapiens	Swanport Aborigines	1195	Brown	0.0001	Brown
H. sapiens	Swanport Aborigines	1195	Brown	0.0001	Brown
H. sapiens	Spialfields	1195	Brown	0.0001	Brown
H. sapiens	Murray Valley Aborigines	1198	Brown	0.0001	Brown
H. sapiens	Murray Valley Aborigines	1200	Brown	0.0001	Brown
H. sapiens	Swanport Aborigines	1200	Brown	0.0001	Brown
H. sapiens	N. China	1200	Brown	0.0001	Brown
H. sapiens	Murray Valley Aborigines	1203	Brown	0.0001	Brown
H. sapiens	Murray Valley Aborigines	1206	Brown	0.0001	Brown
H. sapiens	China	1207	Brown	0.0001	Brown
H. sapiens	Murray Valley Aborigines	1210	Brown	0.0001	Brown
H. sapiens	Swanport Aborigines	1215	Brown	0.0001	Brown
H. sapiens	Spialfields	1215	Brown	0.0001	Brown
H. sapiens	Swanport Aborigines	1225	Brown	0.0001	Brown
H. sapiens	Spialfields	1225	Brown	0.0001	Brown
H. sapiens	Murray Valley Aborigines	1226	Brown	0.0001	Brown
H. sapiens	Murray Valley Aborigines	1228	Brown	0.0001	Brown
H. sapiens	Swanport Aborigines	1230	Brown	0.0001	Brown
H. sapiens	China	1230	Brown	0.0001	Brown
H. sapiens	China	1230	Brown	0.0001	Brown
H. sapiens	Spialfields	1230	Brown	0.0001	Brown
H. sapiens	Spialfields	1230	Brown	0.0001	Brown
H. sapiens	Murray Valley Aborigines	1235	Brown	0.0001	Brown
H. sapiens	Murray Valley Aborigines	1235	Brown	0.0001	Brown
H. sapiens	Swanport Aborigines	1235	Brown	0.0001	Brown
H. sapiens	Swanport Aborigines	1235	Brown	0.0001	Brown
H. sapiens	Swanport Aborigines	1235	Brown	0.0001	Brown
H. sapiens	China	1236	Brown	0.0001	Brown
H. sapiens	Swanport Aborigines	1240	Brown	0.0001	Brown
H. sapiens	N. China	1240	Brown	0.0001	Brown
H. sapiens	Spialfields	1240	Brown	0.0001	Brown
H. sapiens	Murray Valley Aborigines	1243	Brown	0.0001	Brown
H. sapiens	Swanport Aborigines	1245	Brown	0.0001	Brown
H. sapiens	Spialfields	1250	Brown	0.0001	Brown
H. sapiens	Spialfields	1250	Brown	0.0001	Brown
H. sapiens	Murray Valley Aborigines	1251	Brown	0.0001	Brown
H. sapiens	Murray Valley Aborigines	1251	Brown	0.0001	Brown
H. sapiens	Murray Valley Aborigines	1257	Brown	0.0001	Brown
H. sapiens	Murray Valley Aborigines	1257	Brown	0.0001	Brown
H. sapiens	Murray Valley Aborigines	1259	Brown	0.0001	Brown
H. sapiens	Swanport Aborigines	1260	Brown	0.0001	Brown
H. sapiens	Swanport Aborigines	1260	Brown	0.0001	Brown
H. sapiens	Swanport Aborigines	1260	Brown	0.0001	Brown
H. sapiens	Spialfields	1260	Brown	0.0001	Brown
H. sapiens	Spialfields	1260	Brown	0.0001	Brown
H. sapiens	N. China	1262	Brown	0.0001	Brown
H. sapiens	Murray Valley Aborigines	1266	Brown	0.0001	Brown
H. sapiens	Murray Valley Aborigines	1266	Brown	0.0001	Brown
H. sapiens	Murray Valley Aborigines	1267	Brown	0.0001	Brown
H. sapiens	Murray Valley Aborigines	1269	Brown	0.0001	Brown
H. sapiens	Spialfields	1270	Brown	0.0001	Brown
H. sapiens	Murray Valley Aborigines	1272	Brown	0.0001	Brown
H. sapiens	Murray Valley Aborigines	1273	Brown	0.0001	Brown
H. sapiens	Murray Valley Aborigines	1274	Brown	0.0001	Brown
H. sapiens	China	1274	Brown	0.0001	Brown
H. sapiens	Swanport Aborigines	1275	Brown	0.0001	Brown
H. sapiens	China	1279	Brown	0.0001	Brown
H. sapiens	Swanport Aborigines	1280	Brown	0.0001	Brown
H. sapiens	N. China	1280	Brown	0.0001	Brown
H. sapiens	N. China	1280	Brown	0.0001	Brown
H. sapiens	N. China	1280	Brown	0.0001	Brown
H. sapiens	Murray Valley Aborigines	1281	Brown	0.0001	Brown
H. sapiens	Murray Valley Aborigines	1282	Brown	0.0001	Brown
H. sapiens	China	1287	Brown	0.0001	Brown
H. sapiens	Murray Valley Aborigines	1290	Brown	0.0001	Brown
H. sapiens	N. China	1290	Brown	0.0001	Brown
H. sapiens	Spialfields	1290	Brown	0.0001	Brown
H. sapiens	China	1291	Brown	0.0001	Brown
H. sapiens	Murray Valley Aborigines	1292	Brown	0.0001	Brown
H. sapiens	China	1294	Brown	0.0001	Brown
H. sapiens	Swanport Aborigines	1295	Brown	0.0001	Brown
H. sapiens	Swanport Aborigines	1295	Brown	0.0001	Brown
H. sapiens	China	1299	Brown	0.0001	Brown
H. sapiens	N. China	1299	Brown	0.0001	Brown
H. sapiens	N. China	1300	Brown	0.0001	Brown
H. sapiens	N. China	1300	Brown	0.0001	Brown
H. sapiens	Murray Valley Aborigines	1302	Brown	0.0001	Brown
H. sapiens	Murray Valley Aborigines	1302	Brown	0.0001	Brown
H. sapiens	Murray Valley Aborigines	1304	Brown	0.0001	Brown
H. sapiens	Murray Valley Aborigines	1305	Brown	0.0001	Brown
H. sapiens	China	1305	Brown	0.0001	Brown
H. sapiens	China	1305	Brown	0.0001	Brown
H. sapiens	Murray Valley Aborigines	1306	Brown	0.0001	Brown
H. sapiens	Murray Valley Aborigines	1306	Brown	0.0001	Brown
H. sapiens	Swanport Aborigines	1310	Brown	0.0001	Brown
H. sapiens	Swanport Aborigines	1310	Brown	0.0001	Brown
H. sapiens	Spialfields	1310	Brown	0.0001	Brown
H. sapiens	Spialfields	1310	Brown	0.0001	Brown
H. sapiens	China	1313	Brown	0.0001	Brown
H. sapiens	Murray Valley Aborigines	1314	Brown	0.0001	Brown
H. sapiens	Swanport Aborigines	1315	Brown	0.0001	Brown
H. sapiens	N. China	1320	Brown	0.0001	Brown
H. sapiens	Spialfields	1320	Brown	0.0001	Brown
H. sapiens	Murray Valley Aborigines	1325	Brown	0.0001	Brown
H. sapiens	Swanport Aborigines	1325	Brown	0.0001	Brown
H. sapiens	N. China	1326	Brown	0.0001	Brown
H. sapiens	Murray Valley Aborigines	1330	Brown	0.0001	Brown
H. sapiens	N. China	1330	Brown	0.0001	Brown
H. sapiens	Swanport Aborigines	1335	Brown	0.0001	Brown
H. sapiens	China	1335	Brown	0.0001	Brown
H. sapiens	Murray Valley Aborigines	1337	Brown	0.0001	Brown
H. sapiens	China	1337	Brown	0.0001	Brown
H. sapiens	Murray Valley Aborigines	1340	Brown	0.0001	Brown
H. sapiens	Swanport Aborigines	1340	Brown	0.0001	Brown
H. sapiens	China	1340	Brown	0.0001	Brown
H. sapiens	N. China	1340	Brown	0.0001	Brown
H. sapiens	N. China	1340	Brown	0.0001	Brown
H. sapiens	Spialfields	1340	Brown	0.0001	Brown
H. sapiens	Spialfields	1340	Brown	0.0001	Brown
H. sapiens	Murray Valley Aborigines	1341	Brown	0.0001	Brown
H. sapiens	Murray Valley Aborigines	1345	Brown	0.0001	Brown
H. sapiens	Spialfields	1350	Brown	0.0001	Brown
H. sapiens	Spialfields	1350	Brown	0.0001	Brown
H. sapiens	Murray Valley Aborigines	1358	Brown	0.0001	Brown
H. sapiens	N. China	1359	Brown	0.0001	Brown
H. sapiens	N. China	1360	Brown	0.0001	Brown
H. sapiens	N. China	1360	Brown	0.0001	Brown
H. sapiens	Spialfields	1360	Brown	0.0001	Brown
H. sapiens	Spialfields	1360	Brown	0.0001	Brown
H. sapiens	Spialfields	1360	Brown	0.0001	Brown
H. sapiens	Murray Valley Aborigines	1361	Brown	0.0001	Brown
H. sapiens	Murray Valley Aborigines	1361	Brown	0.0001	Brown
H. sapiens	China	1361	Brown	0.0001	Brown
H. sapiens	China	1361	Brown	0.0001	Brown
H. sapiens	Swanport Aborigines	1365	Brown	0.0001	Brown
H. sapiens	Murray Valley Aborigines	1369	Brown	0.0001	Brown
H. sapiens	N. China	1372	Brown	0.0001	Brown
H. sapiens	China	1376	Brown	0.0001	Brown
H. sapiens	Murray Valley Aborigines	1377	Brown	0.0001	Brown
H. sapiens	Spialfields	1380	Brown	0.0001	Brown
H. sapiens	China	1388	Brown	0.0001	Brown
H. sapiens	Murray Valley Aborigines	1389	Brown	0.0001	Brown
H. sapiens	China	1389	Brown	0.0001	Brown
H. sapiens	Murray Valley Aborigines	1390	Brown	0.0001	Brown
H. sapiens	N. China	1390	Brown	0.0001	Brown
H. sapiens	N. China	1390	Brown	0.0001	Brown
H. sapiens	Spialfields	1390	Brown	0.0001	Brown
H. sapiens	Murray Valley Aborigines	1398	Brown	0.0001	Brown
H. sapiens	Swanport Aborigines	1400	Brown	0.0001	Brown
H. sapiens	China	1404	Brown	0.0001	Brown
H. sapiens	Swanport Aborigines	1405	Brown	0.0001	Brown
H. sapiens	China	1408	Brown	0.0001	Brown
H. sapiens	N. China	1410	Brown	0.0001	Brown
H. sapiens	Spialfields	1410	Brown	0.0001	Brown
H. sapiens	N. China	1420	Brown	0.0001	Brown
H. sapiens	N. China	1420	Brown	0.0001	Brown
H. sapiens	Spialfields	1420	Brown	0.0001	Brown
H. sapiens	China	1426	Brown	0.0001	Brown
H. sapiens	China	1429	Brown	0.0001	Brown
H. sapiens	China	1430	Brown	0.0001	Brown
H. sapiens	Murray Valley Aborigines	1432	Brown	0.0001	Brown
H. sapiens	N. China	1440	Brown	0.0001	Brown
H. sapiens	N. China	1440	Brown	0.0001	Brown
H. sapiens	N. China	1440	Brown	0.0001	Brown
H. sapiens	Spialfields	1440	Brown	0.0001	Brown
H. sapiens	N. China	1448	Brown	0.0001	Brown
H. sapiens	N. China	1450	Brown	0.0001	Brown
H. sapiens	China	1452	Brown	0.0001	Brown
H. sapiens	N. China	1452	Brown	0.0001	Brown
H. sapiens	N. China	1453	Brown	0.0001	Brown
H. sapiens	Spialfields	1455	Brown	0.0001	Brown
H. sapiens	China	1458	Brown	0.0001	Brown
H. sapiens	N. China	1460	Brown	0.0001	Brown
H. sapiens	N. China	1460	Brown	0.0001	Brown
H. sapiens	Spialfields	1460	Brown	0.0001	Brown
H. sapiens	China	1467	Brown	0.0001	Brown
H. sapiens	China	1474	Brown	0.0001	Brown
H. sapiens	Spialfields	1475	Brown	0.0001	Brown
H. sapiens	China	1482	Brown	0.0001	Brown
H. sapiens	N. China	1490	Brown	0.0001	Brown
H. sapiens	China	1496	Brown	0.0001	Brown
H. sapiens	China	1503	Brown	0.0001	Brown
H. sapiens	China	1508	Brown	0.0001	Brown
H. sapiens	China	1512	Brown	0.0001	Brown
H. sapiens	China	1516	Brown	0.0001	Brown
H. sapiens	China	1528	Brown	0.0001	Brown
H. sapiens	China	1532	Brown	0.0001	Brown
H. sapiens	Swanport Aborigines	1535	Brown	0.0001	Brown
H. sapiens	China	1537	Brown	0.0001	Brown
H. sapiens	N. China	1540	Brown	0.0001	Brown
H. sapiens	Spialfields	1565	Brown	0.0001	Brown
H. sapiens	China	1571	Brown	0.0001	Brown
H. sapiens	China	1575	Brown	0.0001	Brown
H. sapiens	China	1575	Brown	0.0001	Brown
H. sapiens	China	1577	Brown	0.0001	Brown
H. sapiens	N. China	1600	Brown	0.0001	Brown
H. sapiens	China	1605	Brown	0.0001	Brown
H. sapiens	China	1608	Brown	0.0001	Brown
H. sapiens	China	1612	Brown	0.0001	Brown
H. sapiens	China	1619	Brown	0.0001	Brown
H. sapiens	China	1622	Brown	0.0001	Brown
H. sapiens	China	1632	Brown	0.0001	Brown
H. sapiens	China	1675	Brown	0.0001	Brown
H. sapiens	China	1682	Brown	0.0001	Brown
H. sapiens	China	1695	Brown	0.0001	Brown
H. sapiens	China	1776	Brown	0.0001	Brown
H. sapiens	Morton	1297	Lewis et al., 2011	0.0001	Lewis et al., 2011
H. sapiens	Morton	1381.26	Lewis et al., 2011	0.0001	Lewis et al., 2011
H. sapiens	Morton	1165.45	Lewis et al., 2011	0.0001	Lewis et al., 2011
H. sapiens	Morton	1347.26	Lewis et al., 2011	0.0001	Lewis et al., 2011
H. sapiens	Morton	1229.18	Lewis et al., 2011	0.0001	Lewis et al., 2011
H. sapiens	Morton	1640.37	Lewis et al., 2011	0.0001	Lewis et al., 2011
H. sapiens	Morton	1167.56	Lewis et al., 2011	0.0001	Lewis et al., 2011
H. sapiens	Morton	1236.65	Lewis et al., 2011	0.0001	Lewis et al., 2011
H. sapiens	Morton	1283.92	Lewis et al., 2011	0.0001	Lewis et al., 2011
H. sapiens	Morton	1149.64	Lewis et al., 2011	0.0001	Lewis et al., 2011
H. sapiens	Morton	1250.97	Lewis et al., 2011	0.0001	Lewis et al., 2011
H. sapiens	Morton	1265.95	Lewis et al., 2011	0.0001	Lewis et al., 2011
H. sapiens	Morton	1520.29	Lewis et al., 2011	0.0001	Lewis et al., 2011
H. sapiens	Morton	1255.93	Lewis et al., 2011	0.0001	Lewis et al., 2011
H. sapiens	Morton	1143.2	Lewis et al., 2011	0.0001	Lewis et al., 2011
H. sapiens	Morton	1400.79	Lewis et al., 2011	0.0001	Lewis et al., 2011
H. sapiens	Morton	1063.76	Lewis et al., 2011	0.0001	Lewis et al., 2011
H. sapiens	Morton	1514.59	Lewis et al., 2011	0.0001	Lewis et al., 2011
H. sapiens	Morton	1196.95	Lewis et al., 2011	0.0001	Lewis et al., 2011
H. sapiens	Morton	1461.79	Lewis et al., 2011	0.0001	Lewis et al., 2011
H. sapiens	Morton	1481.98	Lewis et al., 2011	0.0001	Lewis et al., 2011
H. sapiens	Morton	1424.62	Lewis et al., 2011	0.0001	Lewis et al., 2011
H. sapiens	Morton	1285.24	Lewis et al., 2011	0.0001	Lewis et al., 2011
H. sapiens	Morton	1345.94	Lewis et al., 2011	0.0001	Lewis et al., 2011
H. sapiens	Morton	1348.25	Lewis et al., 2011	0.0001	Lewis et al., 2011
H. sapiens	Morton	1542.66	Lewis et al., 2011	0.0001	Lewis et al., 2011
H. sapiens	Morton	1336.48	Lewis et al., 2011	0.0001	Lewis et al., 2011
H. sapiens	Morton	1344.14	Lewis et al., 2011	0.0001	Lewis et al., 2011
H. sapiens	Morton	1406.46	Lewis et al., 2011	0.0001	Lewis et al., 2011
H. sapiens	Morton	1238.59	Lewis et al., 2011	0.0001	Lewis et al., 2011
H. sapiens	Morton	1319.35	Lewis et al., 2011	0.0001	Lewis et al., 2011
H. sapiens	Morton	1325.99	Lewis et al., 2011	0.0001	Lewis et al., 2011
H. sapiens	Morton	1182.69	Lewis et al., 2011	0.0001	Lewis et al., 2011
H. sapiens	Morton	985.16	Lewis et al., 2011	0.0001	Lewis et al., 2011
H. sapiens	Morton	1386	Lewis et al., 2011	0.0001	Lewis et al., 2011
H. sapiens	Morton	1453.8	Lewis et al., 2011	0.0001	Lewis et al., 2011
H. sapiens	Morton	1179.51	Lewis et al., 2011	0.0001	Lewis et al., 2011
H. sapiens	Morton	1187.96	Lewis et al., 2011	0.0001	Lewis et al., 2011
H. sapiens	Morton	1380.47	Lewis et al., 2011	0.0001	Lewis et al., 2011
H. sapiens	Morton	1249.36	Lewis et al., 2011	0.0001	Lewis et al., 2011
H. sapiens	Morton	1110.77	Lewis et al., 2011	0.0001	Lewis et al., 2011
H. sapiens	Morton	1179.22	Lewis et al., 2011	0.0001	Lewis et al., 2011
H. sapiens	Morton	1110.13	Lewis et al., 2011	0.0001	Lewis et al., 2011
H. sapiens	Morton	1245.44	Lewis et al., 2011	0.0001	Lewis et al., 2011
H. sapiens	Morton	1050.93	Lewis et al., 2011	0.0001	Lewis et al., 2011
H. sapiens	Morton	1166.85	Lewis et al., 2011	0.0001	Lewis et al., 2011
H. sapiens	Morton	1235.45	Lewis et al., 2011	0.0001	Lewis et al., 2011
H. sapiens	Morton	1195.81	Lewis et al., 2011	0.0001	Lewis et al., 2011
H. sapiens	Morton	1351.32	Lewis et al., 2011	0.0001	Lewis et al., 2011
H. sapiens	Morton	1345.12	Lewis et al., 2011	0.0001	Lewis et al., 2011
H. sapiens	Morton	1371.89	Lewis et al., 2011	0.0001	Lewis et al., 2011
H. sapiens	Morton	1225.92	Lewis et al., 2011	0.0001	Lewis et al., 2011
H. sapiens	Morton	1234.36	Lewis et al., 2011	0.0001	Lewis et al., 2011
H. sapiens	Morton	1168.12	Lewis et al., 2011	0.0001	Lewis et al., 2011
H. sapiens	Morton	1376.01	Lewis et al., 2011	0.0001	Lewis et al., 2011
H. sapiens	Morton	1254.44	Lewis et al., 2011	0.0001	Lewis et al., 2011
H. sapiens	Morton	1319.83	Lewis et al., 2011	0.0001	Lewis et al., 2011
H. sapiens	Morton	1304.55	Lewis et al., 2011	0.0001	Lewis et al., 2011
H. sapiens	Morton	1375.8	Lewis et al., 2011	0.0001	Lewis et al., 2011
H. sapiens	Morton	1525.8	Lewis et al., 2011	0.0001	Lewis et al., 2011
H. sapiens	Morton	1427.64	Lewis et al., 2011	0.0001	Lewis et al., 2011
H. sapiens	Morton	1363.12	Lewis et al., 2011	0.0001	Lewis et al., 2011
H. sapiens	Morton	1257.12	Lewis et al., 2011	0.0001	Lewis et al., 2011
H. sapiens	Morton	1785.5	Lewis et al., 2011	0.0001	Lewis et al., 2011
H. sapiens	Morton	1442.41	Lewis et al., 2011	0.0001	Lewis et al., 2011
H. sapiens	Morton	1419.96	Lewis et al., 2011	0.0001	Lewis et al., 2011
H. sapiens	Morton	1067.71	Lewis et al., 2011	0.0001	Lewis et al., 2011
H. sapiens	Morton	1307.51	Lewis et al., 2011	0.0001	Lewis et al., 2011
H. sapiens	Morton	1304.55	Lewis et al., 2011	0.0001	Lewis et al., 2011
H. sapiens	Morton	1197.15	Lewis et al., 2011	0.0001	Lewis et al., 2011
H. sapiens	Morton	1233.65	Lewis et al., 2011	0.0001	Lewis et al., 2011
H. sapiens	Morton	1456.76	Lewis et al., 2011	0.0001	Lewis et al., 2011
H. sapiens	Morton	1315.88	Lewis et al., 2011	0.0001	Lewis et al., 2011
H. sapiens	Morton	1166.55	Lewis et al., 2011	0.0001	Lewis et al., 2011
H. sapiens	Morton	1192.24	Lewis et al., 2011	0.0001	Lewis et al., 2011
H. sapiens	Morton	1295.44	Lewis et al., 2011	0.0001	Lewis et al., 2011
H. sapiens	Morton	1375.53	Lewis et al., 2011	0.0001	Lewis et al., 2011
H. sapiens	Morton	1293.02	Lewis et al., 2011	0.0001	Lewis et al., 2011
H. sapiens	Morton	1196.8	Lewis et al., 2011	0.0001	Lewis et al., 2011
H. sapiens	Morton	1143.24	Lewis et al., 2011	0.0001	Lewis et al., 2011
H. sapiens	Morton	1333.6	Lewis et al., 2011	0.0001	Lewis et al., 2011
H. sapiens	Morton	985.29	Lewis et al., 2011	0.0001	Lewis et al., 2011
H. sapiens	Morton	1486.37	Lewis et al., 2011	0.0001	Lewis et al., 2011
H. sapiens	Morton	1427.66	Lewis et al., 2011	0.0001	Lewis et al., 2011
H. sapiens	Morton	1178.65	Lewis et al., 2011	0.0001	Lewis et al., 2011
H. sapiens	Morton	1472.44	Lewis et al., 2011	0.0001	Lewis et al., 2011
H. sapiens	Morton	1503.97	Lewis et al., 2011	0.0001	Lewis et al., 2011
H. sapiens	Morton	1411.24	Lewis et al., 2011	0.0001	Lewis et al., 2011
H. sapiens	Morton	1271.06	Lewis et al., 2011	0.0001	Lewis et al., 2011
H. sapiens	Morton	1437.06	Lewis et al., 2011	0.0001	Lewis et al., 2011
H. sapiens	Morton	1343.69	Lewis et al., 2011	0.0001	Lewis et al., 2011
H. sapiens	Morton	1336.93	Lewis et al., 2011	0.0001	Lewis et al., 2011
H. sapiens	Morton	1294.67	Lewis et al., 2011	0.0001	Lewis et al., 2011
H. sapiens	Morton	1187.01	Lewis et al., 2011	0.0001	Lewis et al., 2011
H. sapiens	Morton	1348.44	Lewis et al., 2011	0.0001	Lewis et al., 2011
H. sapiens	Morton	1384.8	Lewis et al., 2011	0.0001	Lewis et al., 2011
H. sapiens	Morton	1073.76	Lewis et al., 2011	0.0001	Lewis et al., 2011
H. sapiens	Morton	1187.13	Lewis et al., 2011	0.0001	Lewis et al., 2011
H. sapiens	Morton	1524.67	Lewis et al., 2011	0.0001	Lewis et al., 2011
H. sapiens	Morton	1523.36	Lewis et al., 2011	0.0001	Lewis et al., 2011
H. sapiens	Morton	1405.18	Lewis et al., 2011	0.0001	Lewis et al., 2011
H. sapiens	Morton	1296.29	Lewis et al., 2011	0.0001	Lewis et al., 2011
H. sapiens	Morton	1403.72	Lewis et al., 2011	0.0001	Lewis et al., 2011
H. sapiens	Morton	1324.65	Lewis et al., 2011	0.0001	Lewis et al., 2011
H. sapiens	Morton	1510.02	Lewis et al., 2011	0.0001	Lewis et al., 2011
H. sapiens	Morton	1191.01	Lewis et al., 2011	0.0001	Lewis et al., 2011
H. sapiens	Morton	1529.01	Lewis et al., 2011	0.0001	Lewis et al., 2011
H. sapiens	Morton	1346.37	Lewis et al., 2011	0.0001	Lewis et al., 2011
H. sapiens	Morton	1201.53	Lewis et al., 2011	0.0001	Lewis et al., 2011
H. sapiens	Morton	1175.27	Lewis et al., 2011	0.0001	Lewis et al., 2011
H. sapiens	Morton	1589.11	Lewis et al., 2011	0.0001	Lewis et al., 2011
H. sapiens	Morton	1344.85	Lewis et al., 2011	0.0001	Lewis et al., 2011
H. sapiens	Morton	1527.94	Lewis et al., 2011	0.0001	Lewis et al., 2011
H. sapiens	Morton	1369.48	Lewis et al., 2011	0.0001	Lewis et al., 2011
H. sapiens	Morton	1114.22	Lewis et al., 2011	0.0001	Lewis et al., 2011
H. sapiens	Morton	906.66	Lewis et al., 2011	0.0001	Lewis et al., 2011
H. sapiens	Morton	1391.8	Lewis et al., 2011	0.0001	Lewis et al., 2011
H. sapiens	Morton	1371.78	Lewis et al., 2011	0.0001	Lewis et al., 2011
H. sapiens	Morton	1377.17	Lewis et al., 2011	0.0001	Lewis et al., 2011
H. sapiens	Morton	1453.91	Lewis et al., 2011	0.0001	Lewis et al., 2011
H. sapiens	Morton	1403.86	Lewis et al., 2011	0.0001	Lewis et al., 2011
H. sapiens	Morton	1402.23	Lewis et al., 2011	0.0001	Lewis et al., 2011
H. sapiens	Morton	1414.59	Lewis et al., 2011	0.0001	Lewis et al., 2011
H. sapiens	Morton	1242.53	Lewis et al., 2011	0.0001	Lewis et al., 2011
H. sapiens	Morton	1250.83	Lewis et al., 2011	0.0001	Lewis et al., 2011
H. sapiens	Morton	1109.01	Lewis et al., 2011	0.0001	Lewis et al., 2011
H. sapiens	Morton	1236.39	Lewis et al., 2011	0.0001	Lewis et al., 2011
H. sapiens	Morton	1187.03	Lewis et al., 2011	0.0001	Lewis et al., 2011
H. sapiens	Morton	1400.92	Lewis et al., 2011	0.0001	Lewis et al., 2011
H. sapiens	Morton	1315.45	Lewis et al., 2011	0.0001	Lewis et al., 2011
H. sapiens	Morton	1234.45	Lewis et al., 2011	0.0001	Lewis et al., 2011
H. sapiens	Morton	1463.97	Lewis et al., 2011	0.0001	Lewis et al., 2011
H. sapiens	Morton	1184.27	Lewis et al., 2011	0.0001	Lewis et al., 2011
H. sapiens	Morton	1299.35	Lewis et al., 2011	0.0001	Lewis et al., 2011
H. sapiens	Morton	1249.03	Lewis et al., 2011	0.0001	Lewis et al., 2011
H. sapiens	Morton	1079.06	Lewis et al., 2011	0.0001	Lewis et al., 2011
H. sapiens	Morton	1263.04	Lewis et al., 2011	0.0001	Lewis et al., 2011
H. sapiens	Morton	1066.24	Lewis et al., 2011	0.0001	Lewis et al., 2011
H. sapiens	Morton	1287.6	Lewis et al., 2011	0.0001	Lewis et al., 2011
H. sapiens	Morton	1261.24	Lewis et al., 2011	0.0001	Lewis et al., 2011
H. sapiens	Morton	1488.41	Lewis et al., 2011	0.0001	Lewis et al., 2011
H. sapiens	Morton	1323.46	Lewis et al., 2011	0.0001	Lewis et al., 2011
H. sapiens	Morton	1202.07	Lewis et al., 2011	0.0001	Lewis et al., 2011
H. sapiens	Morton	1392.22	Lewis et al., 2011	0.0001	Lewis et al., 2011
H. sapiens	Morton	1203.43	Lewis et al., 2011	0.0001	Lewis et al., 2011
H. sapiens	Morton	1157.49	Lewis et al., 2011	0.0001	Lewis et al., 2011
H. sapiens	Morton	1173.94	Lewis et al., 2011	0.0001	Lewis et al., 2011
H. sapiens	Morton	1114.22	Lewis et al., 2011	0.0001	Lewis et al., 2011
H. sapiens	Morton	1242.26	Lewis et al., 2011	0.0001	Lewis et al., 2011
H. sapiens	Morton	1231.99	Lewis et al., 2011	0.0001	Lewis et al., 2011
H. sapiens	Morton	1265.88	Lewis et al., 2011	0.0001	Lewis et al., 2011
H. sapiens	Morton	1530.84	Lewis et al., 2011	0.0001	Lewis et al., 2011
H. sapiens	Morton	1452.49	Lewis et al., 2011	0.0001	Lewis et al., 2011
H. sapiens	Morton	1352.39	Lewis et al., 2011	0.0001	Lewis et al., 2011
H. sapiens	Morton	1408.47	Lewis et al., 2011	0.0001	Lewis et al., 2011
H. sapiens	Morton	1093.49	Lewis et al., 2011	0.0001	Lewis et al., 2011
H. sapiens	Morton	1539.22	Lewis et al., 2011	0.0001	Lewis et al., 2011
H. sapiens	Morton	1412.6	Lewis et al., 2011	0.0001	Lewis et al., 2011
H. sapiens	Morton	1312.85	Lewis et al., 2011	0.0001	Lewis et al., 2011
H. sapiens	Morton	1387.6	Lewis et al., 2011	0.0001	Lewis et al., 2011
H. sapiens	Morton	1301.93	Lewis et al., 2011	0.0001	Lewis et al., 2011
H. sapiens	Morton	1448.37	Lewis et al., 2011	0.0001	Lewis et al., 2011
H. sapiens	Morton	1174.88	Lewis et al., 2011	0.0001	Lewis et al., 2011
H. sapiens	Morton	1185.86	Lewis et al., 2011	0.0001	Lewis et al., 2011
H. sapiens	Morton	1293.4	Lewis et al., 2011	0.0001	Lewis et al., 2011
H. sapiens	Morton	1252.17	Lewis et al., 2011	0.0001	Lewis et al., 2011
H. sapiens	Morton	1299.16	Lewis et al., 2011	0.0001	Lewis et al., 2011
H. sapiens	Morton	1354.05	Lewis et al., 2011	0.0001	Lewis et al., 2011
H. sapiens	Morton	1404.44	Lewis et al., 2011	0.0001	Lewis et al., 2011
H. sapiens	Morton	1224.88	Lewis et al., 2011	0.0001	Lewis et al., 2011
H. sapiens	Morton	1393.06	Lewis et al., 2011	0.0001	Lewis et al., 2011
H. sapiens	Morton	1155.77	Lewis et al., 2011	0.0001	Lewis et al., 2011
H. sapiens	Morton	1299.32	Lewis et al., 2011	0.0001	Lewis et al., 2011
H. sapiens	Morton	1203.02	Lewis et al., 2011	0.0001	Lewis et al., 2011
H. sapiens	Morton	1261.84	Lewis et al., 2011	0.0001	Lewis et al., 2011
H. sapiens	Morton	1353.9	Lewis et al., 2011	0.0001	Lewis et al., 2011
H. sapiens	Morton	1360.62	Lewis et al., 2011	0.0001	Lewis et al., 2011
H. sapiens	Morton	1236.47	Lewis et al., 2011	0.0001	Lewis et al., 2011
H. sapiens	Morton	1289.4	Lewis et al., 2011	0.0001	Lewis et al., 2011
H. sapiens	Morton	1412.22	Lewis et al., 2011	0.0001	Lewis et al., 2011
H. sapiens	Morton	1401.88	Lewis et al., 2011	0.0001	Lewis et al., 2011
H. sapiens	Morton	1351.88	Lewis et al., 2011	0.0001	Lewis et al., 2011
H. sapiens	Morton	1304.05	Lewis et al., 2011	0.0001	Lewis et al., 2011
H. sapiens	Morton	1459.45	Lewis et al., 2011	0.0001	Lewis et al., 2011
H. sapiens	Morton	1369.81	Lewis et al., 2011	0.0001	Lewis et al., 2011
H. sapiens	Morton	1190.75	Lewis et al., 2011	0.0001	Lewis et al., 2011
H. sapiens	Morton	1333.15	Lewis et al., 2011	0.0001	Lewis et al., 2011
H. sapiens	Morton	1344.78	Lewis et al., 2011	0.0001	Lewis et al., 2011
H. sapiens	Morton	1370.07	Lewis et al., 2011	0.0001	Lewis et al., 2011
H. sapiens	Morton	1208.9	Lewis et al., 2011	0.0001	Lewis et al., 2011
H. sapiens	Morton	1213.37	Lewis et al., 2011	0.0001	Lewis et al., 2011
H. sapiens	Morton	1323.06	Lewis et al., 2011	0.0001	Lewis et al., 2011
H. sapiens	Morton	1372.23	Lewis et al., 2011	0.0001	Lewis et al., 2011
H. sapiens	Morton	1468.51	Lewis et al., 2011	0.0001	Lewis et al., 2011
H. sapiens	Morton	1521.87	Lewis et al., 2011	0.0001	Lewis et al., 2011
H. sapiens	Morton	1435.32	Lewis et al., 2011	0.0001	Lewis et al., 2011
H. sapiens	Morton	1220.17	Lewis et al., 2011	0.0001	Lewis et al., 2011
H. sapiens	Morton	1116.67	Lewis et al., 2011	0.0001	Lewis et al., 2011
H. sapiens	Morton	1395.49	Lewis et al., 2011	0.0001	Lewis et al., 2011
H. sapiens	Morton	1021.61	Lewis et al., 2011	0.0001	Lewis et al., 2011
H. sapiens	Morton	1195.09	Lewis et al., 2011	0.0001	Lewis et al., 2011
H. sapiens	Morton	1329.67	Lewis et al., 2011	0.0001	Lewis et al., 2011
H. sapiens	Morton	1294.07	Lewis et al., 2011	0.0001	Lewis et al., 2011
H. sapiens	Morton	1359.1	Lewis et al., 2011	0.0001	Lewis et al., 2011
H. sapiens	Morton	1416.39	Lewis et al., 2011	0.0001	Lewis et al., 2011
H. sapiens	Morton	1203.23	Lewis et al., 2011	0.0001	Lewis et al., 2011
H. sapiens	Morton	1216.07	Lewis et al., 2011	0.0001	Lewis et al., 2011
H. sapiens	Morton	1291.84	Lewis et al., 2011	0.0001	Lewis et al., 2011
H. sapiens	Morton	1326.32	Lewis et al., 2011	0.0001	Lewis et al., 2011
H. sapiens	Morton	1339.88	Lewis et al., 2011	0.0001	Lewis et al., 2011
H. sapiens	Morton	1420.81	Lewis et al., 2011	0.0001	Lewis et al., 2011
H. sapiens	Morton	1473.14	Lewis et al., 2011	0.0001	Lewis et al., 2011
H. sapiens	Morton	1372.31	Lewis et al., 2011	0.0001	Lewis et al., 2011
H. sapiens	Morton	1414.29	Lewis et al., 2011	0.0001	Lewis et al., 2011
H. sapiens	Morton	1406.77	Lewis et al., 2011	0.0001	Lewis et al., 2011
H. sapiens	Morton	1269.51	Lewis et al., 2011	0.0001	Lewis et al., 2011
H. sapiens	Morton	1320	Lewis et al., 2011	0.0001	Lewis et al., 2011
H. sapiens	Morton	1449.63	Lewis et al., 2011	0.0001	Lewis et al., 2011
H. sapiens	Morton	1478.1	Lewis et al., 2011	0.0001	Lewis et al., 2011
H. sapiens	Morton	1402.09	Lewis et al., 2011	0.0001	Lewis et al., 2011
H. sapiens	Morton	1104.41	Lewis et al., 2011	0.0001	Lewis et al., 2011
H. sapiens	Morton	1070.64	Lewis et al., 2011	0.0001	Lewis et al., 2011
H. sapiens	Morton	1420.99	Lewis et al., 2011	0.0001	Lewis et al., 2011
H. sapiens	Morton	1638.49	Lewis et al., 2011	0.0001	Lewis et al., 2011
H. sapiens	Morton	1514.94	Lewis et al., 2011	0.0001	Lewis et al., 2011
H. sapiens	Morton	1330.29	Lewis et al., 2011	0.0001	Lewis et al., 2011
H. sapiens	Morton	1442.7	Lewis et al., 2011	0.0001	Lewis et al., 2011
H. sapiens	Morton	1498.92	Lewis et al., 2011	0.0001	Lewis et al., 2011
H. sapiens	Morton	1330.9	Lewis et al., 2011	0.0001	Lewis et al., 2011
H. sapiens	Morton	1433.17	Lewis et al., 2011	0.0001	Lewis et al., 2011
H. sapiens	Morton	1632.96	Lewis et al., 2011	0.0001	Lewis et al., 2011
H. sapiens	Morton	1429.37	Lewis et al., 2011	0.0001	Lewis et al., 2011
H. sapiens	Morton	1484.29	Lewis et al., 2011	0.0001	Lewis et al., 2011
H. sapiens	Morton	1345.12	Lewis et al., 2011	0.0001	Lewis et al., 2011
H. sapiens	Morton	1267.35	Lewis et al., 2011	0.0001	Lewis et al., 2011
H. sapiens	Morton	1241.91	Lewis et al., 2011	0.0001	Lewis et al., 2011
H. sapiens	Morton	1193.8	Lewis et al., 2011	0.0001	Lewis et al., 2011
H. sapiens	Morton	1260.19	Lewis et al., 2011	0.0001	Lewis et al., 2011
H. sapiens	Morton	1344.07	Lewis et al., 2011	0.0001	Lewis et al., 2011
H. sapiens	Morton	1465.49	Lewis et al., 2011	0.0001	Lewis et al., 2011
H. sapiens	Morton	1307.93	Lewis et al., 2011	0.0001	Lewis et al., 2011
H. sapiens	Morton	1268.64	Lewis et al., 2011	0.0001	Lewis et al., 2011
H. sapiens	Morton	1183.37	Lewis et al., 2011	0.0001	Lewis et al., 2011
H. sapiens	Morton	1268.34	Lewis et al., 2011	0.0001	Lewis et al., 2011
H. sapiens	Morton	1097.72	Lewis et al., 2011	0.0001	Lewis et al., 2011
H. sapiens	Morton	1510.53	Lewis et al., 2011	0.0001	Lewis et al., 2011
H. sapiens	Morton	1155.9	Lewis et al., 2011	0.0001	Lewis et al., 2011
H. sapiens	Morton	1045.45	Lewis et al., 2011	0.0001	Lewis et al., 2011
H. sapiens	Morton	1350.56	Lewis et al., 2011	0.0001	Lewis et al., 2011
H. sapiens	Morton	1286.21	Lewis et al., 2011	0.0001	Lewis et al., 2011
H. sapiens	Morton	1312.75	Lewis et al., 2011	0.0001	Lewis et al., 2011
H. sapiens	Morton	1161.12	Lewis et al., 2011	0.0001	Lewis et al., 2011
H. sapiens	Morton	1253.84	Lewis et al., 2011	0.0001	Lewis et al., 2011
H. sapiens	Morton	1151.6	Lewis et al., 2011	0.0001	Lewis et al., 2011
H. sapiens	Morton	1292.33	Lewis et al., 2011	0.0001	Lewis et al., 2011
H. sapiens	Morton	1388.53	Lewis et al., 2011	0.0001	Lewis et al., 2011
H. sapiens	Morton	1130.18	Lewis et al., 2011	0.0001	Lewis et al., 2011
H. sapiens	Morton	1132.64	Lewis et al., 2011	0.0001	Lewis et al., 2011
H. sapiens	Morton	1303.46	Lewis et al., 2011	0.0001	Lewis et al., 2011
H. sapiens	Morton	1308.12	Lewis et al., 2011	0.0001	Lewis et al., 2011
H. sapiens	Morton	1436.83	Lewis et al., 2011	0.0001	Lewis et al., 2011
H. sapiens	Morton	1382.19	Lewis et al., 2011	0.0001	Lewis et al., 2011
H. sapiens	Morton	1380.18	Lewis et al., 2011	0.0001	Lewis et al., 2011
H. sapiens	Morton	1366.39	Lewis et al., 2011	0.0001	Lewis et al., 2011
H. sapiens	Morton	1297.27	Lewis et al., 2011	0.0001	Lewis et al., 2011
H. sapiens	Morton	1541.73	Lewis et al., 2011	0.0001	Lewis et al., 2011
H. sapiens	Morton	1498.42	Lewis et al., 2011	0.0001	Lewis et al., 2011
H. sapiens	Morton	1167.74	Lewis et al., 2011	0.0001	Lewis et al., 2011
H. sapiens	Morton	1517.19	Lewis et al., 2011	0.0001	Lewis et al., 2011
H. sapiens	Morton	1238.74	Lewis et al., 2011	0.0001	Lewis et al., 2011
H. sapiens	Morton	1344.25	Lewis et al., 2011	0.0001	Lewis et al., 2011
H. sapiens	Morton	1337.4	Lewis et al., 2011	0.0001	Lewis et al., 2011
H. sapiens	Morton	1190.51	Lewis et al., 2011	0.0001	Lewis et al., 2011
H. sapiens	Morton	1195.32	Lewis et al., 2011	0.0001	Lewis et al., 2011
H. sapiens	Morton	1192.17	Lewis et al., 2011	0.0001	Lewis et al., 2011
H. sapiens	Morton	1299.75	Lewis et al., 2011	0.0001	Lewis et al., 2011
H. sapiens	Morton	1158.38	Lewis et al., 2011	0.0001	Lewis et al., 2011
H. sapiens	Morton	1383.18	Lewis et al., 2011	0.0001	Lewis et al., 2011
H. sapiens	Morton	1021.52	Lewis et al., 2011	0.0001	Lewis et al., 2011
H. sapiens	Morton	1272.96	Lewis et al., 2011	0.0001	Lewis et al., 2011
H. sapiens	Morton	1229.04	Lewis et al., 2011	0.0001	Lewis et al., 2011
H. sapiens	Morton	936.53	Lewis et al., 2011	0.0001	Lewis et al., 2011
H. sapiens	Morton	1370.2	Lewis et al., 2011	0.0001	Lewis et al., 2011
H. sapiens	Morton	1163.68	Lewis et al., 2011	0.0001	Lewis et al., 2011
H. sapiens	Morton	1196.8	Lewis et al., 2011	0.0001	Lewis et al., 2011
H. sapiens	Morton	1095.06	Lewis et al., 2011	0.0001	Lewis et al., 2011
H. sapiens	Morton	1195.92	Lewis et al., 2011	0.0001	Lewis et al., 2011
H. sapiens	Morton	1159.6	Lewis et al., 2011	0.0001	Lewis et al., 2011
H. sapiens	Morton	1350.69	Lewis et al., 2011	0.0001	Lewis et al., 2011
H. sapiens	Morton	1049.47	Lewis et al., 2011	0.0001	Lewis et al., 2011
H. sapiens	Morton	1371.97	Lewis et al., 2011	0.0001	Lewis et al., 2011
H. sapiens	Morton	1216.07	Lewis et al., 2011	0.0001	Lewis et al., 2011
H. sapiens	Morton	1129.96	Lewis et al., 2011	0.0001	Lewis et al., 2011
H. sapiens	Morton	1109.47	Lewis et al., 2011	0.0001	Lewis et al., 2011
H. sapiens	Morton	1321.41	Lewis et al., 2011	0.0001	Lewis et al., 2011
H. sapiens	Morton	1007.15	Lewis et al., 2011	0.0001	Lewis et al., 2011
H. sapiens	Morton	1213.33	Lewis et al., 2011	0.0001	Lewis et al., 2011
H. sapiens	Morton	1314.39	Lewis et al., 2011	0.0001	Lewis et al., 2011
H. sapiens	Morton	1354.56	Lewis et al., 2011	0.0001	Lewis et al., 2011
H. sapiens	Morton	1236.03	Lewis et al., 2011	0.0001	Lewis et al., 2011
H. sapiens	Morton	1310.2	Lewis et al., 2011	0.0001	Lewis et al., 2011
H. sapiens	Morton	1228.93	Lewis et al., 2011	0.0001	Lewis et al., 2011
H. sapiens	Morton	1265.75	Lewis et al., 2011	0.0001	Lewis et al., 2011
H. sapiens	Morton	1323.59	Lewis et al., 2011	0.0001	Lewis et al., 2011
H. sapiens	Morton	1053.1	Lewis et al., 2011	0.0001	Lewis et al., 2011
H. sapiens	Morton	1182.95	Lewis et al., 2011	0.0001	Lewis et al., 2011
H. sapiens	Morton	1298.15	Lewis et al., 2011	0.0001	Lewis et al., 2011
